# Supplementary material for: One-pot extraction combined with metal-free photochemical aerobic oxidative desulfurization in deep eutectic solvent
Source: Royal Society of Chemistry journal article supplement (doi:10.1039/c4gc02425g), 2015-01-01
Supplement: c4gc02425g1.pdf [file c4gc02425g1.pdf]

Supplementary information:

## **One-pot extraction combined with metal-free photochemical aerobic oxidative desulfurization in deep eutectic solvent**

Wenshuai Zhu, \*<sup>a</sup> Chao Wang,<sup>a</sup> Hongping Li,<sup>a</sup> Peiwen Wu,<sup>a</sup> Suhang Xun,<sup>a</sup> Wei Jiang,<sup>b</sup> Zhigang Chen,<sup>a</sup> Zhen Zhao<sup>c</sup> and Huaming Li\*<sup>b</sup>

*<sup>a</sup> School of Chemistry and Chemical Engineering, Jiangsu University, 301 Xuefu Road, Zhenjiang 212013, P. R. China*

*<sup>b</sup> Insititute for Energy Research, Jiangsu University, 301 Xuefu Road, Zhenjiang 212013, P. R. China*

*<sup>c</sup> State Key Laboratory of Heavy Oil Processing, Faculty of Science, China University of Petroleum, Beijing 102249, P. R. China*

E-mail: zhuws@ujs.edu.cn (W.S. Zhu) , lhm@ujs.edu.cn (H.M. Li)

**Table S1** The elemental analyses of C、 H、 N in the as-prepared DESs

**Scheme S1** The picture of reaction equipment

**Fig. S1** FT-IR spectra of  $\text{ChCl} \cdot 2\text{HCOOH}$

**Fig. S2** FT-IR spectra of  $\text{ChCl} \cdot 2\text{CH}_3\text{CH}_2\text{COOH}$

**Fig. S3** FT-IR spectra of  $\text{ChCl} \cdot 2\text{CH}_3(\text{CH}_2)_2\text{COOH}$

**Fig. S4** FT-IR spectra of  $\text{ChCl} \cdot 2\text{CH}_3(\text{CH}_2)_3\text{COOH}$

**Fig. S5**  $^1\text{H}$  NMR spectrum of  $\text{ChCl}$

**Fig. S6**  $^1\text{H}$  NMR spectrum of  $\text{CH}_3\text{COOH}$

**Fig. S7**  $^1\text{H}$  NMR spectrum of  $\text{ChCl} \cdot 2\text{CH}_3\text{COOH}$

**Fig. S8** Scan of potential energy surface for IBA with  $\text{O}_2$  reaction

Table S1 The elemental analyses of C、H、N in the as-prepared DESs

| DES                                      |                 | C %   | H %  | N %  |
|------------------------------------------|-----------------|-------|------|------|
| ChCl·2HCOOH                              | Calculate Value | 36.29 | 7.83 | 6.05 |
|                                          | Analysis Found  | 35.46 | 7.91 | 5.91 |
| ChCl·2CH <sub>3</sub> COOH               | Calculate Value | 41.61 | 8.54 | 5.39 |
|                                          | Analysis Found  | 40.75 | 8.59 | 5.28 |
| ChCl·2C <sub>2</sub> H <sub>5</sub> COOH | Calculate Value | 45.91 | 9.11 | 4.87 |
|                                          | Analysis Found  | 45.06 | 9.15 | 4.76 |
| ChCl·2C <sub>3</sub> H <sub>7</sub> COOH | Calculate Value | 49.43 | 9.57 | 4.43 |
|                                          | Analysis Found  | 48.61 | 9.61 | 4.36 |
| ChCl·2C <sub>4</sub> H <sub>9</sub> COOH | Calculate Value | 52.39 | 9.96 | 4.07 |
|                                          | Analysis Found  | 51.58 | 9.98 | 4.01 |

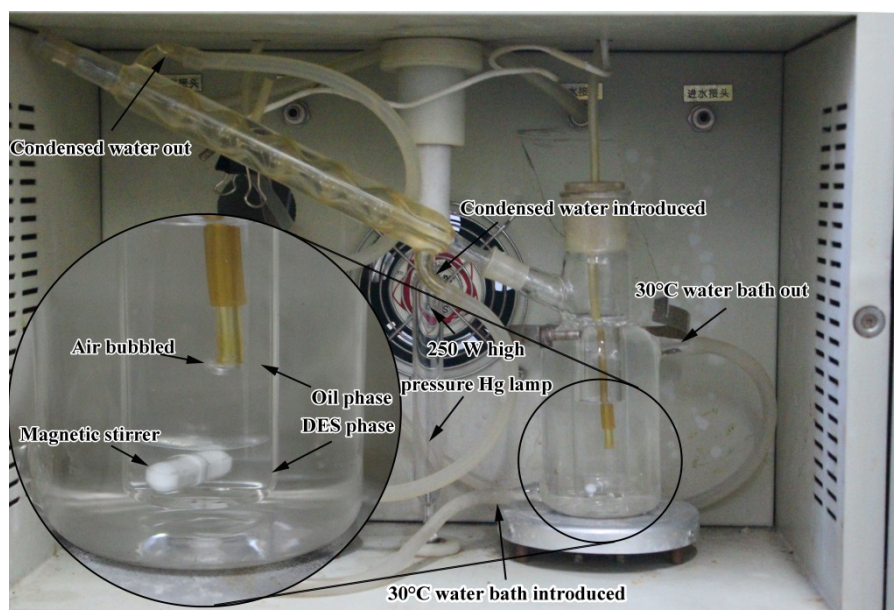

Scheme S1 The picture of reaction equipment

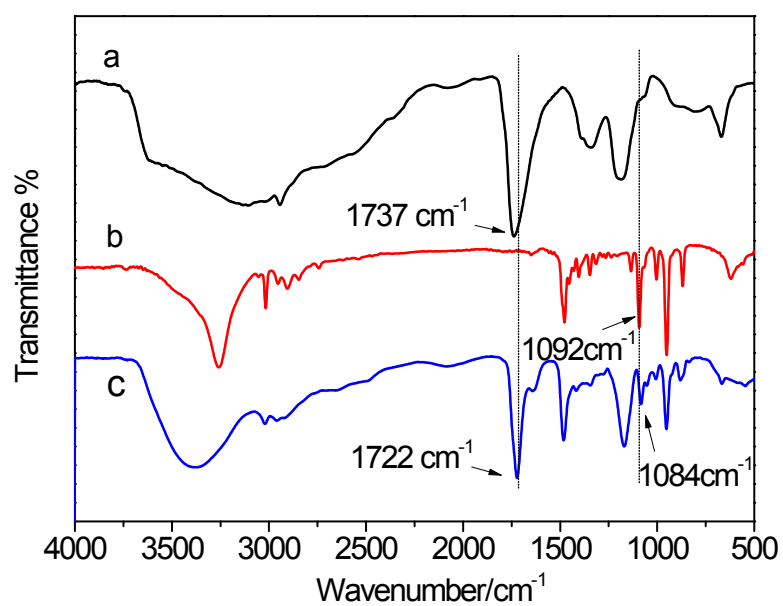

Fig. S1 FT-IR spectra of ChCl·2HCOOH  
 a. HCOOH; b. ChCl; c. ChCl·2HCOOH

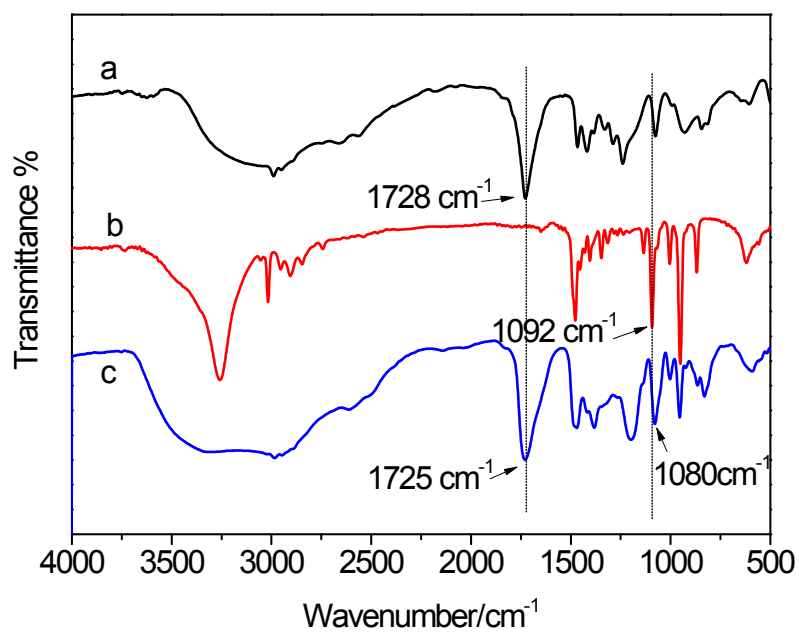

Fig. S2 FT-IR spectra of ChCl·2CH<sub>3</sub>CH<sub>2</sub>COOH  
 a. CH<sub>3</sub>CH<sub>2</sub>COOH; b. ChCl; c. ChCl·2CH<sub>3</sub>CH<sub>2</sub>COOH

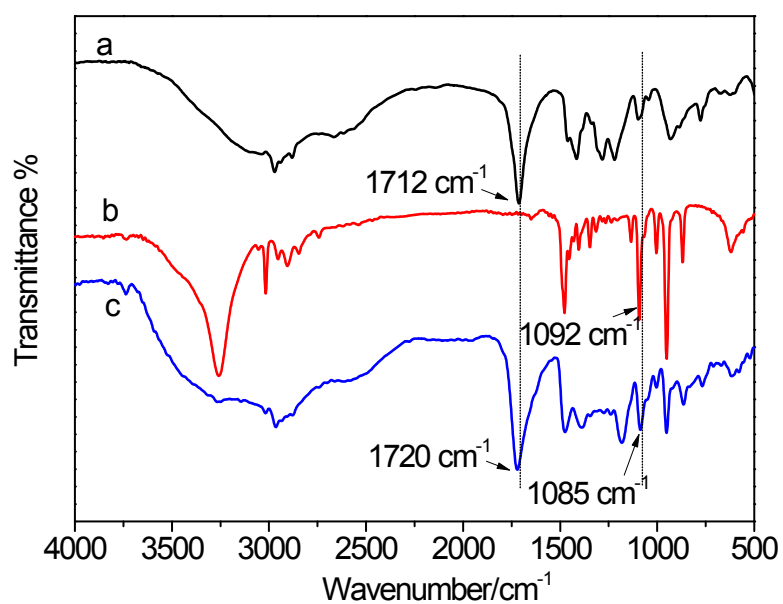

Fig. S3 FT-IR spectra of  $\text{ChCl} \cdot 2\text{CH}_3(\text{CH}_2)_2\text{COOH}$   
 a.  $\text{CH}_3(\text{CH}_2)_2\text{COOH}$ ; b.  $\text{ChCl}$ ; c.  $\text{ChCl} \cdot 2\text{CH}_3(\text{CH}_2)_2\text{COOH}$

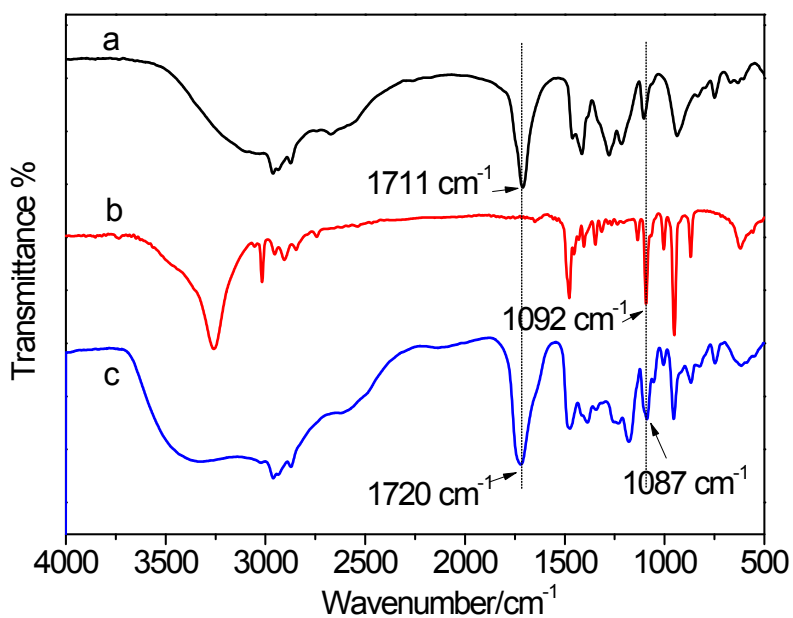

Fig. S4 FT-IR spectra of  $\text{ChCl} \cdot 2\text{CH}_3(\text{CH}_2)_3\text{COOH}$   
 a.  $\text{CH}_3(\text{CH}_2)_3\text{COOH}$ ; b.  $\text{ChCl}$ ; c.  $\text{ChCl} \cdot 2\text{CH}_3(\text{CH}_2)_3\text{COOH}$

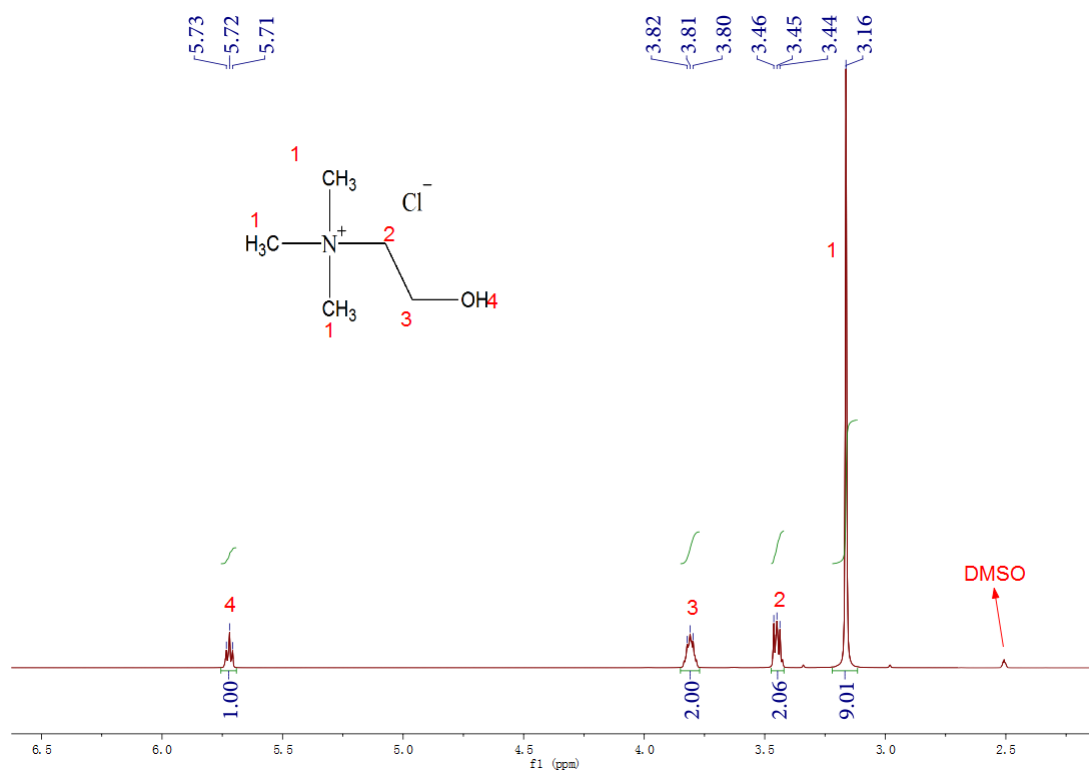

Fig S5 <sup>1</sup>H NMR spectrum of ChCl

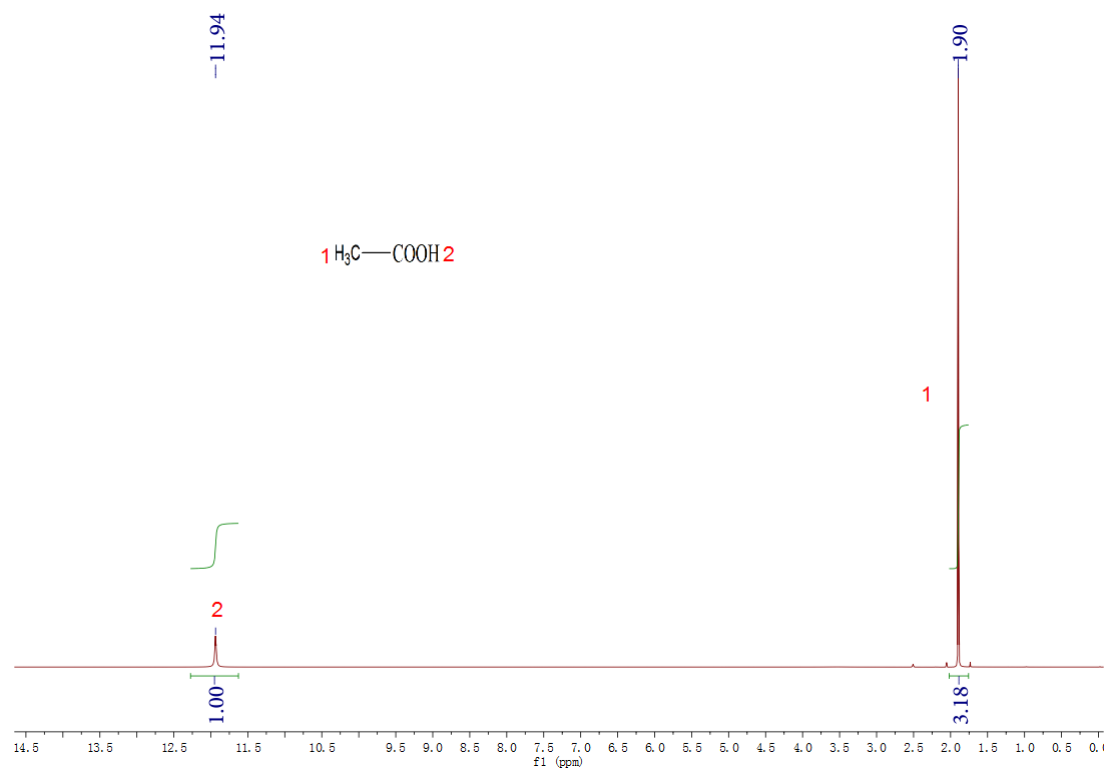

Fig S6 <sup>1</sup>H NMR spectrum of CH<sub>3</sub>COOH

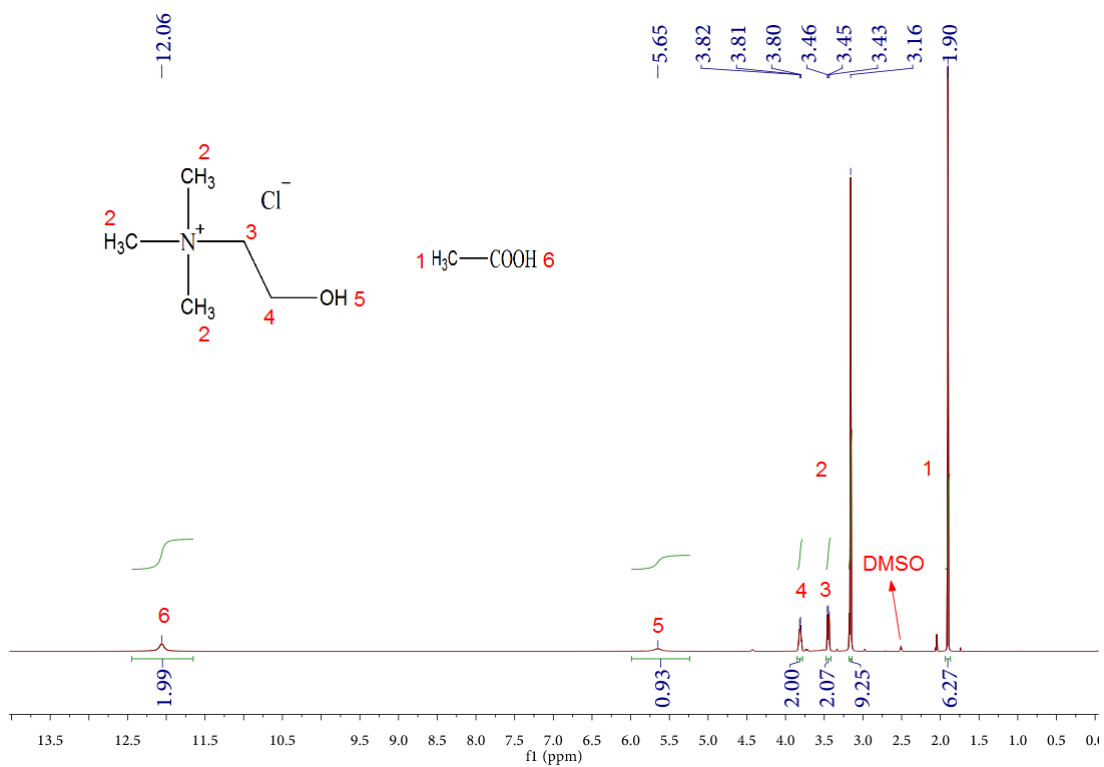

Fig S7  $^1\text{H}$  NMR spectrum of  $\text{ChCl} \cdot 2\text{CH}_3\text{COOH}$

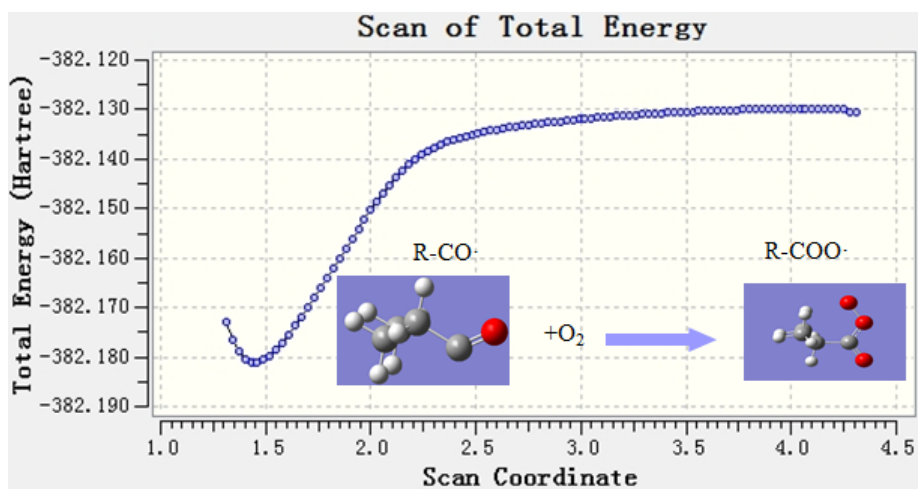

Fig. S8 Scan of potential energy surface for IBA with  $\text{O}_2$  reaction
